# Supplementary material for: Predicting the spread-risk potential of chronic wasting disease to sympatric ungulate species
Source: PubMed Central journal article supplement (PMC7009333; doi:10.1080/19336896.2020.1720486), 2020-02-03
Supplement: kprn-14-01-1720486-s001.pdf [file kprn-14-01-1720486-s001.pdf]

## Supplementary Information

**Table S1** Amino acid accession and database sequence information for cytochrome b sequences used in trait evolution analyses including the resistance matrix for CWD (R = resistant, S = susceptible, U = unknown) for each species. For this analysis humans are used as the reference sequence and are assumed to be resistant to CWD infection.

| Family          | Species                             | CWD | Accession      | Database source | RefSeq accession | Citation                         |
|-----------------|-------------------------------------|-----|----------------|-----------------|------------------|----------------------------------|
| Antilocapridae  | <i>Antilocapra americana</i>        | U   | YP_007625795.1 | RefSeq          | NC_020679.1      | Hassanin et al. 2012             |
| Bovidae         | <i>Bison bison</i>                  | U   | YP_002791041.1 | RefSeq          | NC_012346.1      | Achilli et al. 2008              |
| Bovidae         | <i>Bos taurus</i>                   | R   | YP_209217.1    | RefSeq          | NC_006853.1      | Chung and Ha 2005                |
| Bovidae         | <i>Oreamnos americanus</i>          | U   | YP_007625158.1 | RefSeq          | NC_020630.1      | Hassanin et al. 2009             |
| Bovidae         | <i>Ovis canadensis</i>              | U   | YP_004769596.1 | RefSeq          | NC_015889.1      | Miller et al. 2011               |
| Canidae         | <i>Canis latrans</i>                | R   | YP_626727.1    | RefSeq          | NC_008093.1      | Björnerfeldt et al. 2006         |
| Cebidae         | <i>Saimiri sciureus</i>             | S   | YP_002929489.1 | RefSeq          | NC_012775.1      | Matsui et al. 2009               |
| Cercopithecidae | <i>Macaca fascicularis</i>          | R   | YP_002884238.1 | RefSeq          | NC_012670.1      | Yi et al. 2009                   |
| Cervidae        | <i>Alces alces</i>                  | S   | YP_007625769.1 | RefSeq          | NC_020677.1      | Hassanin et al. 2012             |
| Cervidae        | <i>Alces alces alces</i>            | S   | O47922.1       | UniProt         | NA               | Randi et al. 1998                |
| Cervidae        | <i>Cervus canadensis canadensis</i> | S   | AAL17840.1     | Protein         | NA               | Ludt et al. 2004                 |
| Cervidae        | <i>Muntiacus reevesi</i>            | S   | NP_663804.1    | RefSeq          | NC_004069.1      | Zhang et al. 2010                |
| Cervidae        | <i>Odocoileus hemionus</i>          | S   | YP_007626445.1 | RefSeq          | NC_020729.1      | Hassanin et al. 2012             |
| Cervidae        | <i>Odocoileus virginianus</i>       | S   | YP_004300520.1 | RefSeq          | NC_015247.1      | Seabury et al. 2011              |
| Cervidae        | <i>Rangifer tarandus</i>            | S   | YP_448945.1    | RefSeq          | NC_007703.1      | Wada et al. 2007                 |
| Cervidae        | <i>Rangifer tarandus granti</i>     | S   | AAV84418.1     | Protein         | NA               | Cronin et al. 2005               |
| Cricetidae      | <i>Phodopus sungorus</i>            | R   | ACG76170.1     | Protein         | NA               | Meshchersky and Feoktistova 2009 |
| Felidae         | <i>Felis catus</i>                  | R   | NP_008263.1    | RefSeq          | NC_001700.1      | Lopez et al. 1996                |
| Hominidae       | <i>Homo sapiens</i>                 | R   | YP_003024038.1 | RefSeq          | RefSeq           | Anderson et al. 1981             |
| Mustelidae      | <i>Mustela putorius</i>             | R   | YP_007625262.1 | RefSeq          | NC_020638.1      | Yu et al. 2011                   |

|             |                              |   |                |         |             |                    |
|-------------|------------------------------|---|----------------|---------|-------------|--------------------|
| Mustelidae  | <i>Mustela putorius furo</i> | R | BAB08027.1     | Protein | NA          | Kurose et al. 2000 |
| Mustelidae  | <i>Neovison vison</i>        | R | YP_007625301.1 | RefSeq  | NC_020641.1 | Kurose et al. 2000 |
| Procyonidae | <i>Procyon lotor</i>         | R | YP_001096027.1 | RefSeq  | NC_009126.1 | Takada et al. 2008 |

---

## References

- Achilli, Alessandro, Anna Olivieri, Marco Pellecchia, Cristina Uboldi, Licia Colli, Nadia Al-Zahery, Matteo Accetturo et al. "Mitochondrial genomes of extinct aurochs survive in domestic cattle." *Current Biology* 18, no. 4 (2008): R157-R158. <https://doi.org/10.1016/j.cub.2008.01.019>
- Anderson, Sharon, Alan T. Bankier, Bart G. Barrell, Maarten HL de Bruijn, Alan R. Coulson, Jacques Drouin, Ian C. Eperon et al. "Sequence and organization of the human mitochondrial genome." *Nature* 290, no. 5806 (1981): 457. <https://doi.org/10.1038/290457a0>
- Björnerfeldt, Susanne, Matthew T. Webster, and Carles Vilà. "Relaxation of selective constraint on dog mitochondrial DNA following domestication." *Genome research* 16, no. 8 (2006): 990-994. <https://doi.org/10.1101/gr.5117706>
- Chung, H. Y., & Ha, J. M. (2005). Haplotype analysis of mitochondrial DNA in Korean native cattle. Unpublished, <http://www.ncbi.nlm.nih.gov>.
- Cronin, Matthew A., Michael D. MacNeil, and John C. Patton. "Variation in mitochondrial DNA and microsatellite DNA in caribou (*Rangifer tarandus*) in North America." *Journal of Mammalogy* 86, no. 3 (2005): 495-505. [https://doi.org/10.1644/1545-1542\(2005\)86\[495:VIMDAM\]2.0.CO;2](https://doi.org/10.1644/1545-1542(2005)86[495:VIMDAM]2.0.CO;2)
- Hassanin, A., Delsuc, F., Ropiquet, A., Hammer, C., Van Vuuren, B.J., Matthee, C., Ruiz-Garcia, M., Catzeflis, F., Areskoug, V., Nguyen, T.T. and Couloux, A., 2012. Pattern and timing of diversification of Cetartiodactyla (Mammalia, Laurasiatheria), as revealed by a comprehensive analysis of mitochondrial genomes. *Comptes Rendus Biologies*, 335(1), pp.32-50. <https://doi.org/10.1016/j.crvi.2011.11.002>
- Hassanin, Alexandre, Anne Ropiquet, Arnaud Couloux, and Corinne Cruaud. "Evolution of the mitochondrial genome in mammals living at high altitude: new insights from a study of the tribe Caprini (Bovidae, Antilopinae)." *Journal of molecular evolution* 68, no. 4 (2009): 293-310. <https://doi.org/10.1007/s00239-009-9208-7>

- Kurose, Naoko, Alexei V. Abramov, and Ryuichi Masuda. "Intragenetic diversity of the cytochrome b gene and phylogeny of Eurasian species of the genus *Mustela* (Mustelidae, Carnivora)." *Zoological Science* 17, no. 5 (2000): 673-680. <https://doi.org/10.2108/zsj.17.673>
- Lopez, Jose V., Stanley Cevario, and Stephen J. O'Brien. "Complete nucleotide sequences of the domestic cat (*Felis catus*) mitochondrial genome and a transposed mtDNA tandem repeat (Numt) in the nuclear genome." *Genomics* 33, no. 2 (1996): 229-246. <https://doi.org/10.1006/geno.1996.0188>
- Ludt, Christian J., Wolf Schroeder, Oswald Rottmann, and Ralph Kuehn. "Mitochondrial DNA phylogeography of red deer (*Cervus elaphus*)." *Molecular phylogenetics and evolution* 31, no. 3 (2004): 1064-1083. <https://doi.org/10.1016/j.ympev.2003.10.003>
- Matsui, Atsushi, Felix Rakotondraparany, Isao Munechika, Masami Hasegawa, and Satoshi Horai. "Molecular phylogeny and evolution of prosimians based on complete sequences of mitochondrial DNAs." *Gene* 441, no. 1-2 (2009): 53-66. <https://doi.org/10.1016/j.gene.2008.08.024>
- Meshchersky, I. G., and N. Yu Feoktistova. "Intraspecific organization of dwarf hamsters *Phodopus campbelli* and *Phodopus sungorus* (Rodentia: Cricetinae) basing on mtDNA analysis." In *Doklady Biological Sciences*, vol. 424, no. 1, pp. 35-38. MAIK Nauka/Interperiodica, 2009. <https://doi.org/10.1134/S0012496609010116>
- Miller, Joshua M., René M. Malenfant, Stephen S. Moore, and David W. Coltman. "Short reads, circular genome: skimming solid sequence to construct the bighorn sheep mitochondrial genome." *Journal of Heredity* 103, no. 1 (2011): 140-146. <https://doi.org/10.1093/jhered/esr104>
- Randi, Ettore, Nadia Mucci, Massimo Pierpaoli, and Emmanuel Douzery. "New phylogenetic perspectives on the Cervidae (Artiodactyla) are provided by the mitochondrial cytochrome b gene." *Proceedings of the Royal Society of London. Series B: Biological Sciences* 265, no. 1398 (1998): 793-801. <https://doi.org/10.1098/rspb.1998.0362>
- Seabury, Christopher M., Eric K. Bhattarai, Jeremy F. Taylor, Ganesh G. Viswanathan, Susan M. Cooper, Donald S. Davis, Scot E. Dowd, Mitch L. Lockwood, and Paul M. Seabury. "Genome-wide polymorphism and comparative analyses in the white-tailed deer (*Odocoileus virginianus*): a model

for conservation genomics." PLoS One 6, no. 1 (2011): e15811.

<https://doi.org/10.1371/journal.pone.0015811>

Takada, Y., Mukaida, M. and Imai, T. 2008. Unpublished, <http://www.ncbi.nlm.nih.gov>.

Wada, Kenta, Masahide Nishibori, and Michinari Yokohama. "The complete nucleotide sequence of mitochondrial genome in the Japanese Sika deer (*Cervus nippon*), and a phylogenetic analysis between Cervidae and Bovidae." *Small ruminant research* 69, no. 1-3 (2007): 46-54.

<https://doi.org/10.1016/j.smallrumres.2005.12.002>

Yi, D., Guo, Y., Jiang, Q., Fan, J. and Lan, G. (2009). Sequencing and analysis of the complete mitochondrial genome of the *Macaca fascicularis*. Unpublished, <http://www.ncbi.nlm.nih.gov>.

Yu, Li, Dan Peng, Jiang Liu, Pengtao Luan, Lu Liang, Hang Lee, Muyeong Lee, Oliver A. Ryder, and Yaping Zhang. "On the phylogeny of Mustelidae subfamilies: analysis of seventeen nuclear non-coding loci and mitochondrial complete genomes." *BMC Evolutionary Biology* 11, no. 1 (2011): 92. <https://doi.org/10.1186/1471-2148-11-92>

Zhang, X.M., Zhang, H.J., Mou, Y., Li, J., Yi, G.C. and Shan, X.N. 2010. Unpublished, <http://www.ncbi.nlm.nih.gov>.

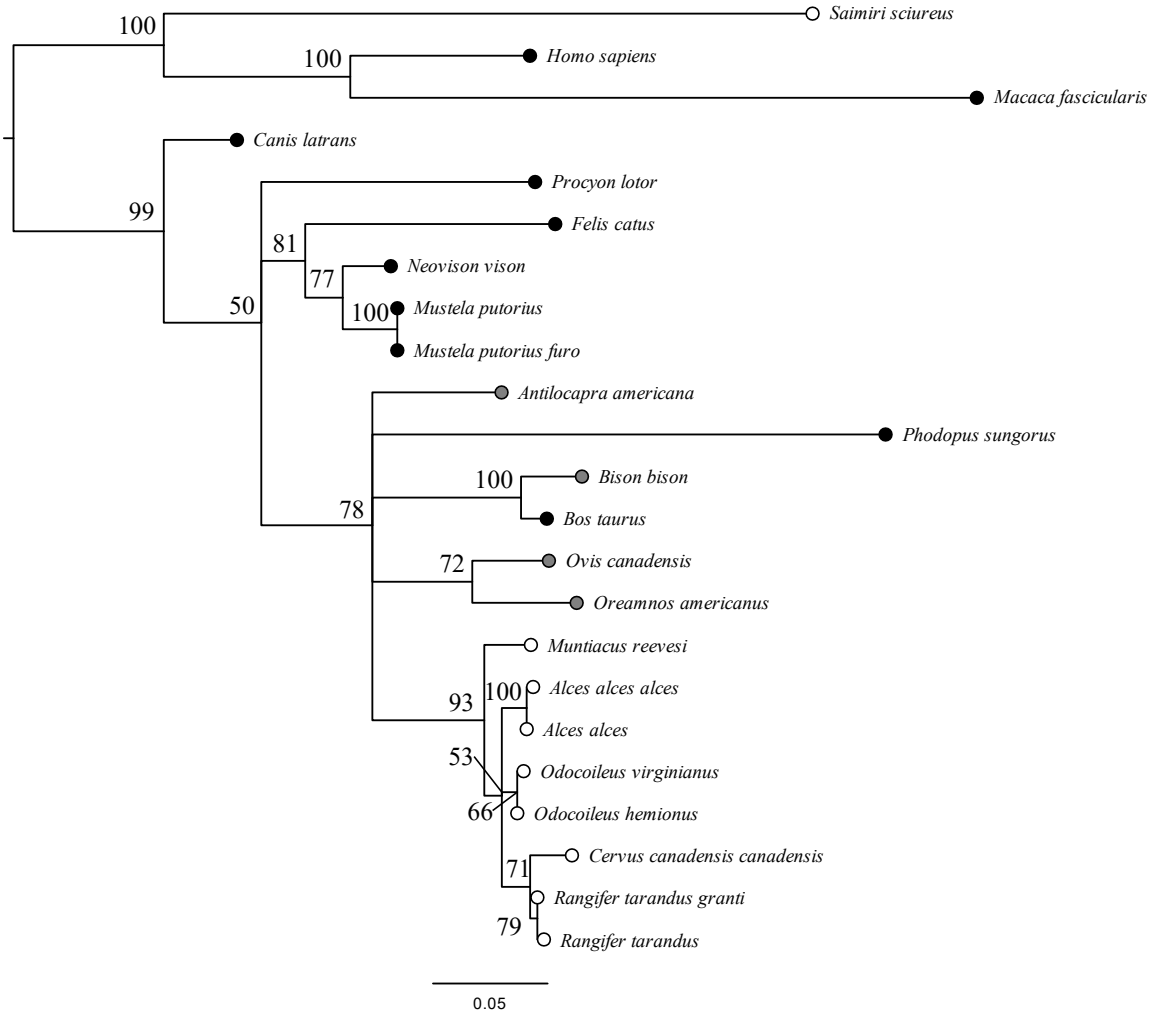

**Figure S1.** Maximum likelihood phylogram of cytochrome b used in ancestral and unknown state predictions. Branches with less than 50% bootstrap support were collapsed. Susceptible species indicated with white circles at branch tips, resistant species with black circles, and unknown with grey.

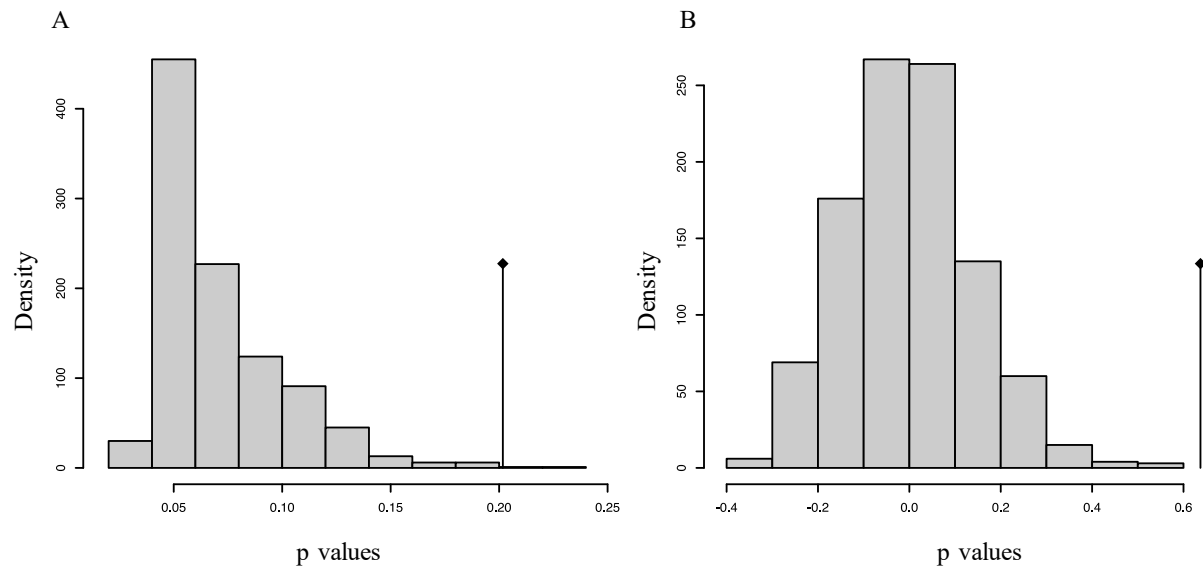

**Figure S2.** Susceptibility to CWD and phylogenetic signal are correlated with (A;  $p = 0.003$ ) and without branch lengths (B;  $p = 0.001$ ) as a factor. Significance of correlation tested using Moran's I with relationships among taxa inferred from the 19 species cytochrome b phylogeny (Fig. 2A) that does not have any missing infection data.

## Additional File 1 - scripts

### Model testing:

```
phymml -i infile.phy -d aa -m MTMAM -f m -v e -a e -c 4 -o tlr  
raxmlHPC-SSE3 -s infile.phy -m PROTGAMMAIMTMAM -n EXEC_NAME -p PARSIMONY_SEED  
raxml-ng --msa infile.phy --model MTMAM+I+G4  
paup -s infile.phy  
iqtree -s infile.phy -m MTMAM+I+G4
```

### Running raxml:

```
raxmlHPC-HYBRID -T 4 -s infile -N autoMRE -n result -k -f a -p 12345 -x 12345 -m PROTCATMTMAMF
```

### Adding BS values to raxml best tree:

```
raxmlHPC-AVX -f b -t RAxML_bestTree.result -z RAxML_bootstrap.result -m PROTCATMTMAMF -n BStree
```

### Phylogenetic correlation

```
setwd("~/Documents/sidePieces/CWD/prnpsequencedata")  
library(adephylo)  
library(ape)  
library(phylobase)  
prnpTre <- read.tree("RAxML_bipartitions.BStree")  
plot(prnpTre)  
suscpetMatr <- read.table("SusceptMatr.txt", header = T, sep = "\t", as.is = 1)  
suscpetMatr <- data.frame(suscpetMatr, row.names = 1)  
prnpTre$node.label <- c()  
prnpData <- phylo4d(prnpTre, suscpetMatr)  
table.phylo4d(prnpData)  
prnp.abTest <- abouheif.moran(prnpData)  
prnp.abTest  
plot(prnp.abTest)  
prnp.prox <- vcv.phylo(prnpTre)  
prnp.abTest2 <- abouheif.moran(prnpData, W=prnp.prox)  
prnp.abTest2
```
